# Supplementary material for: Chitosan Functionalized with Carboxyl Groups as a Recyclable Biomaterial for the Adsorption of Cu (II) and Zn (II) Ions in Aqueous Media
Source: MDPI journal article supplement (doi:10.3390/ijms23042396), 2022-02-21
Supplement: s1 [file s1]

## Electronic supplementary information (ESI)

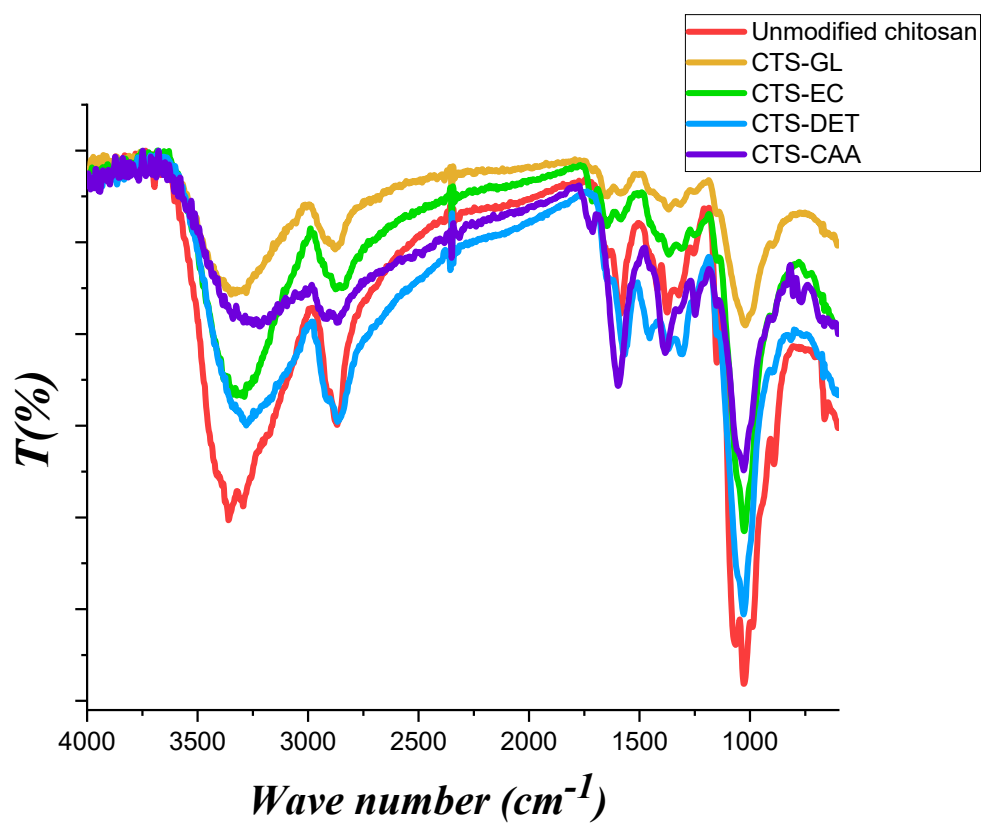

**Figure S1.** FT-IR spectra of (Unmodified chitosan), (CTS-GL), (CTS-EC), (CTS-DET) and (CTS-CAA) [full wavenumber range].

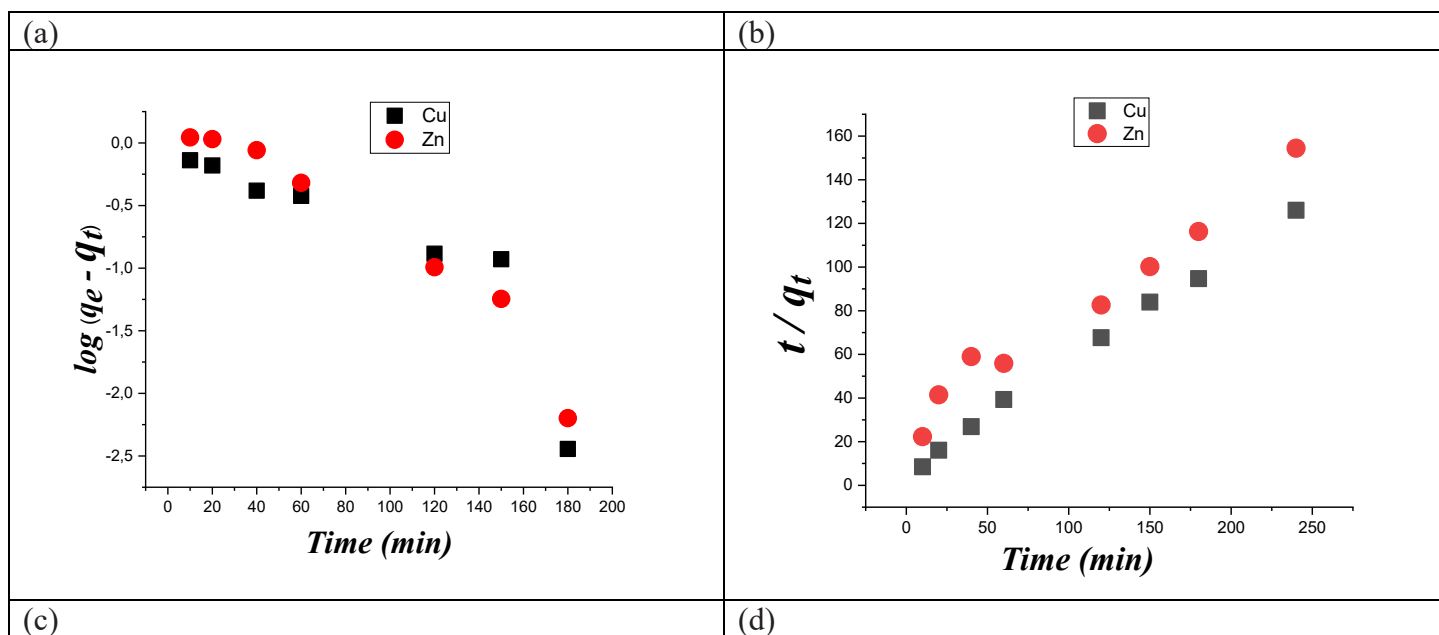

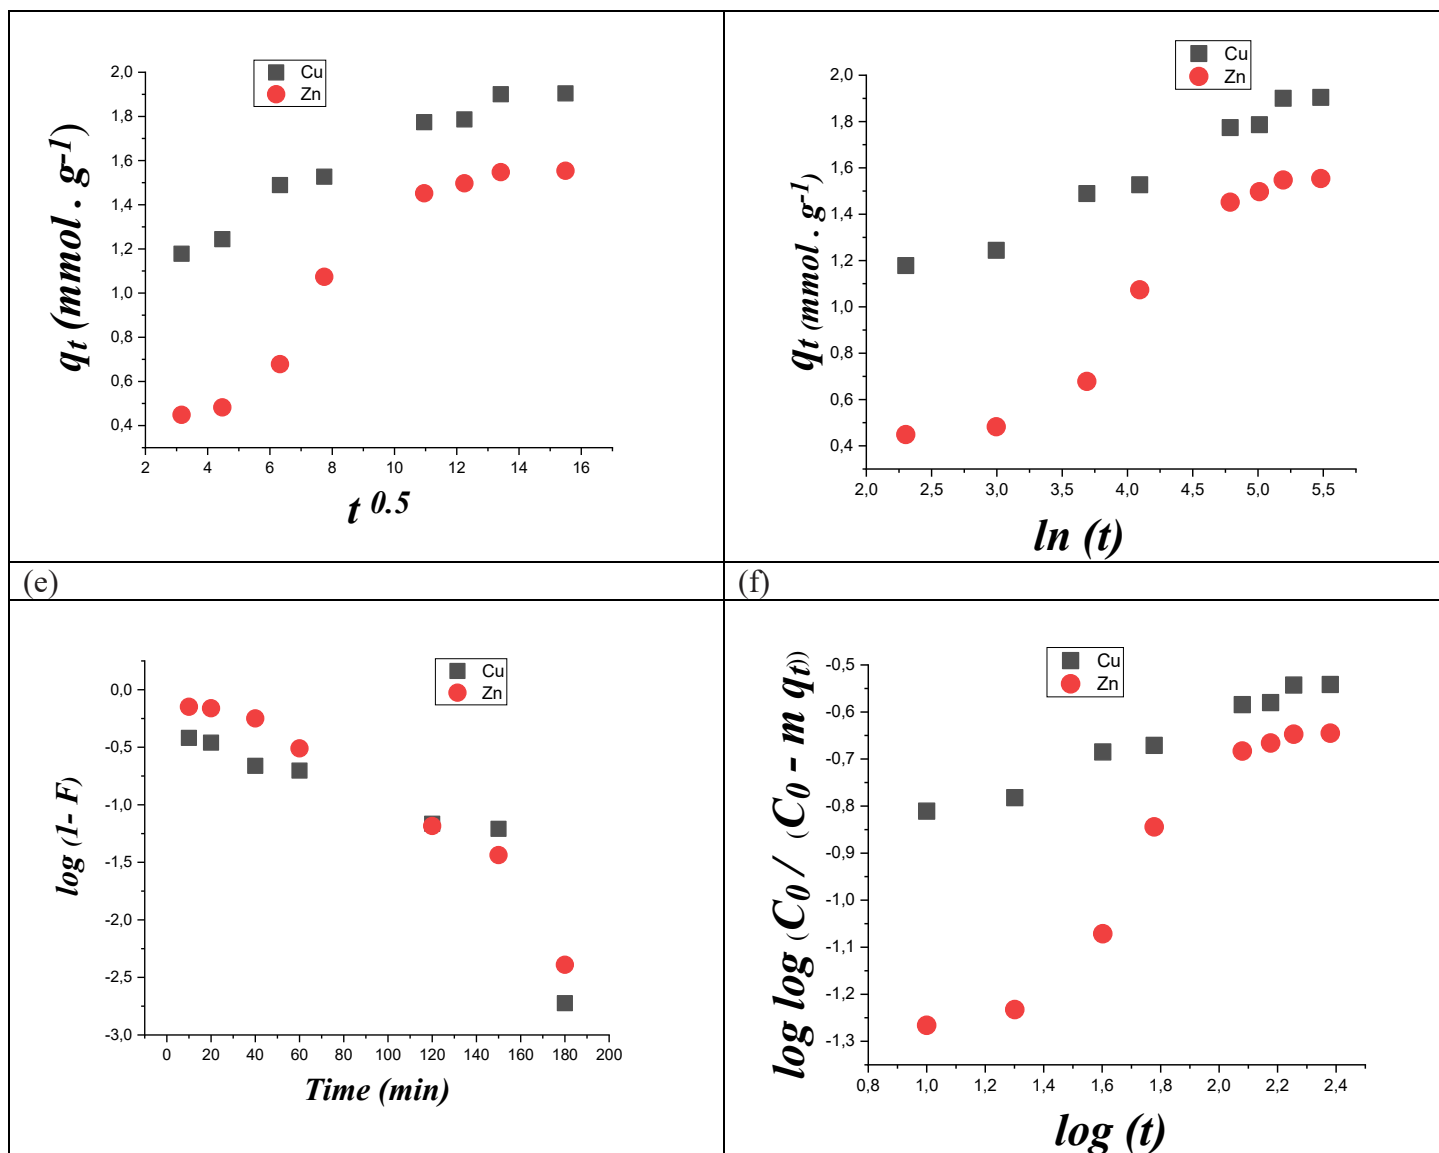

**Figure S2.** Pseudo-first-order plot with slope equal  $(-K_1/2.303)$  and the intercept equal  $\log q_1$  (a), Pseudo-second-order plot with slope equal  $(1/q_2)$  and the intercept equal  $(1/K_2 q_2^2)$  (b), Intraparticle diffusion plot with slope equal  $(K_i)$  and the intercept equal  $(Z)$  (c), Elovich's equation plot with slope equal  $(1/B)$  and the intercept equal  $[(1/B) \ln(aB)]$  (d), Dumwald-Wagner plot with slope equal  $(-K_{fd}/2.303)$  (e), Bangham plot with slope equal  $(\gamma)$  and intercept equal  $\log(m K_\gamma / 2.303 V)$  (f).

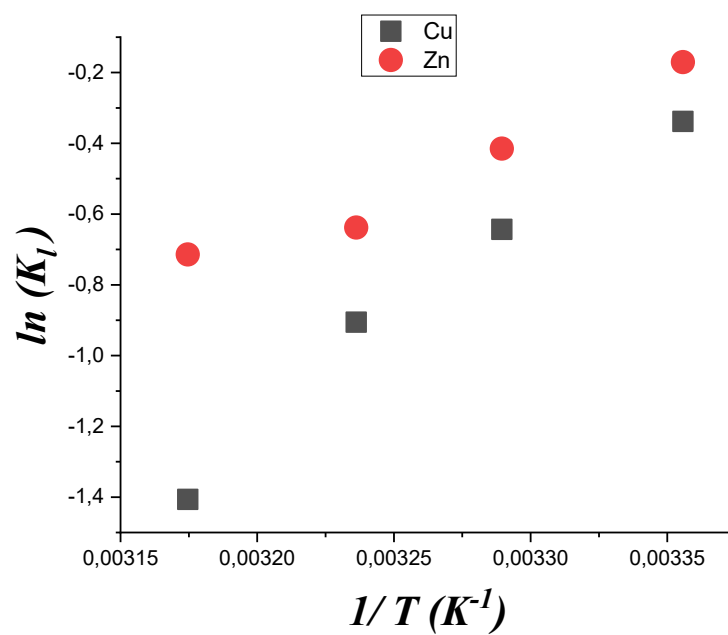

**Figure S3.** Representation of Van't Hoff equation for the adsorption of the metal ions on (CTS-CAA).

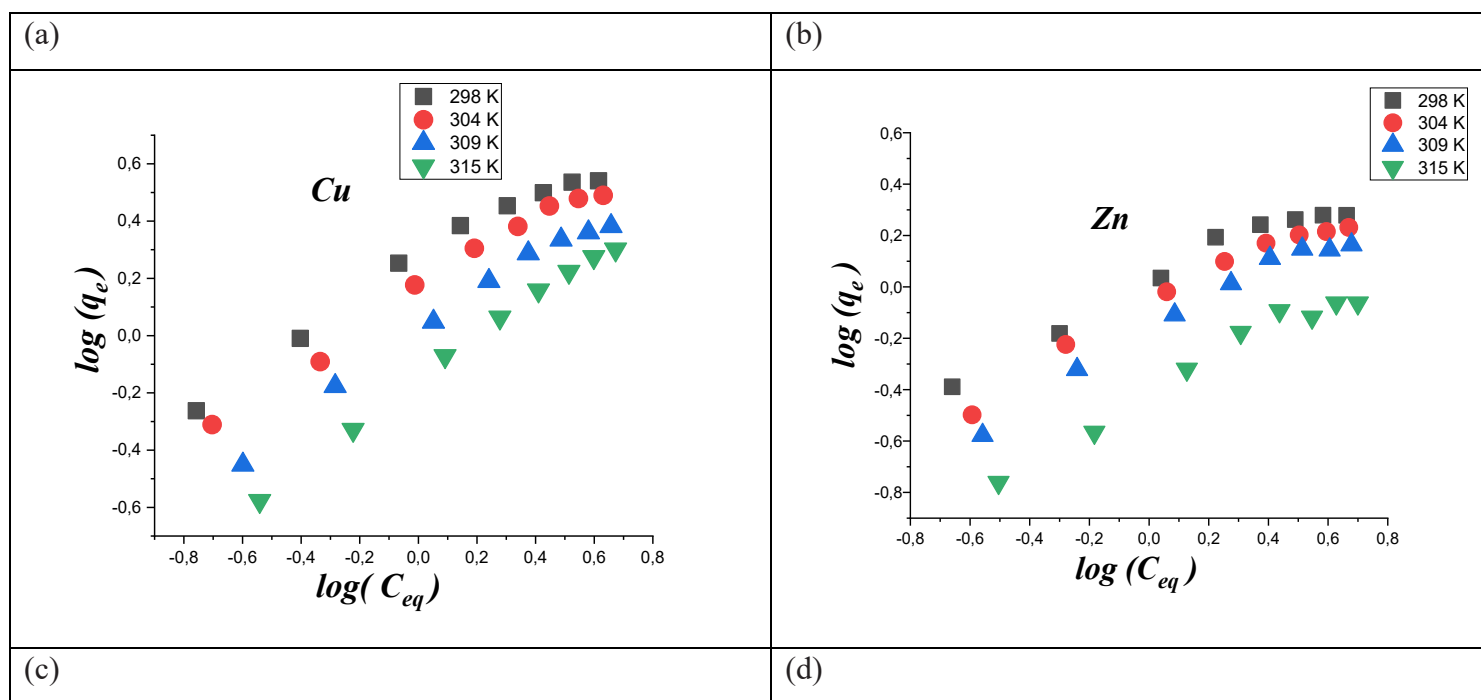

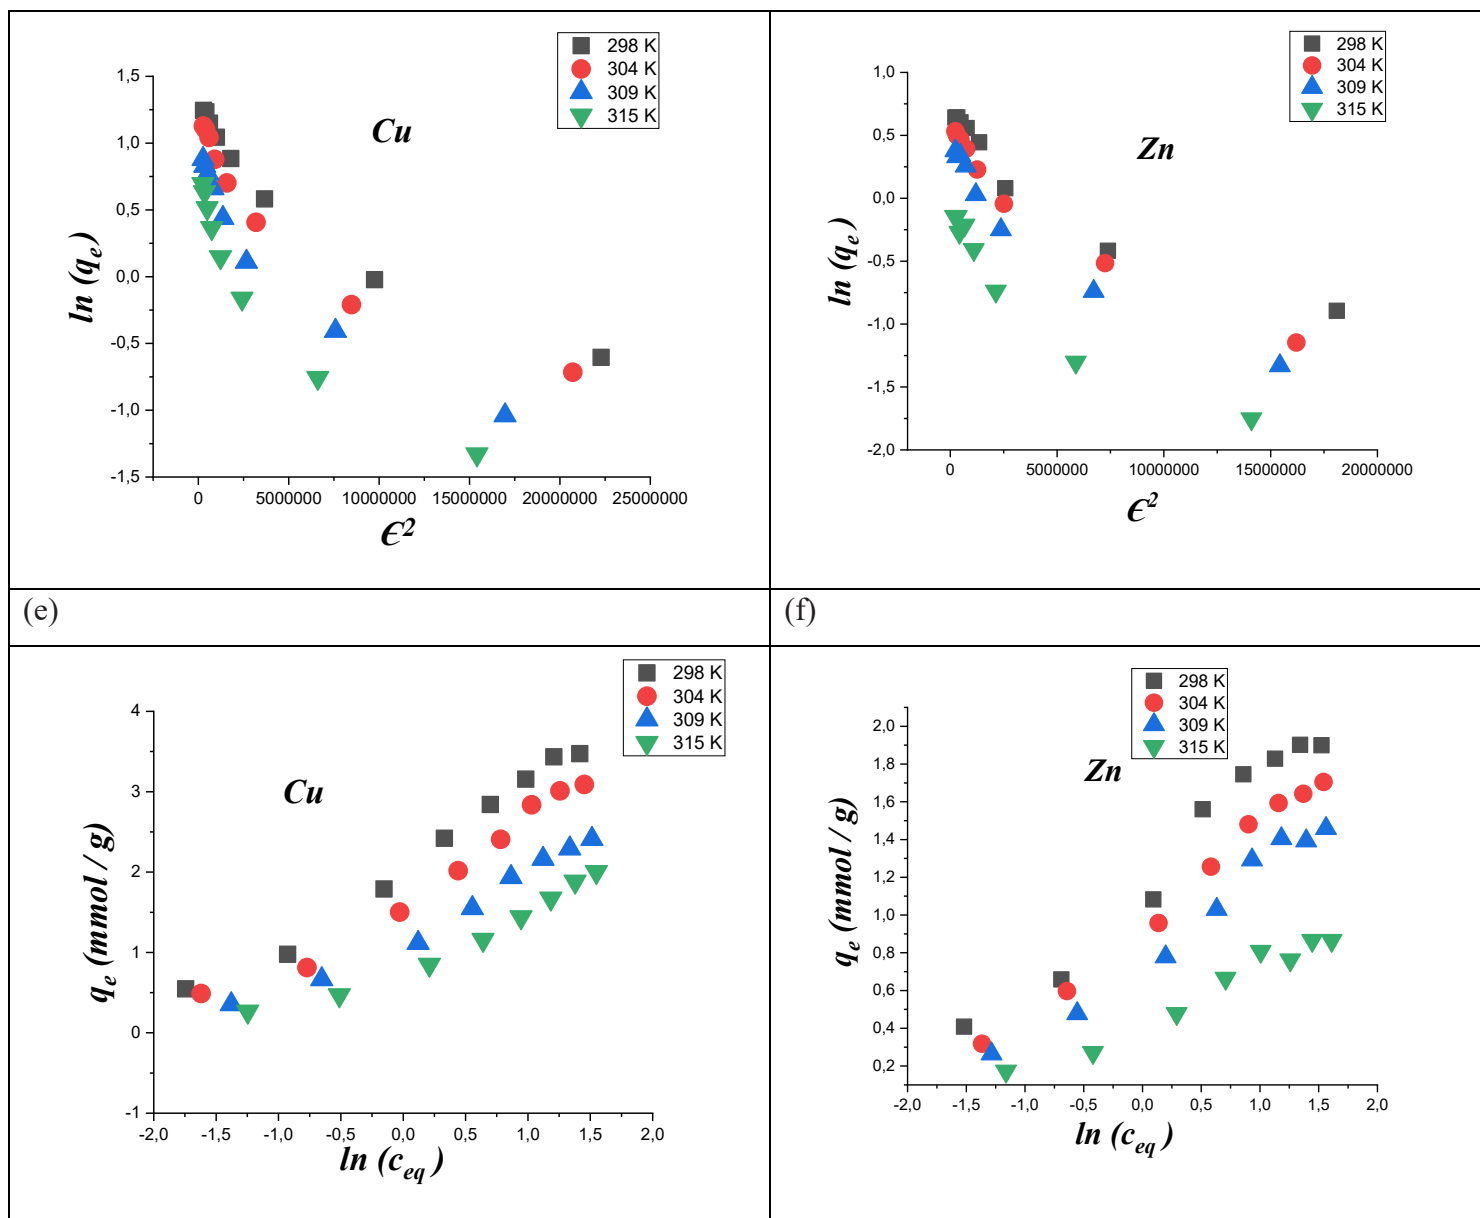

**Figure S4.** Freundlich plots for copper (a) and zinc (b). Dubinin-Radushkevich plots for copper (c) and zinc (d). Temkin plots for copper (e) and zinc (f).

**Table S1.** Kinetic parameters have been estimated by fitting the kinetic models with the experimental results.

| Kinetic model                 | Model parameters | Copper | Zinc   |
|-------------------------------|------------------|--------|--------|
| Equilibrium sorption capacity | $q_e$            | 1.904  | 1.553  |
| Pseudo -first- order          | $q_1$            | 1.282  | 2.166  |
|                               | $K_1$            | 0.024  | 0.028  |
|                               | $R^2$            | 0.7825 | 0.9433 |
| Pseudo-second-order           | $q_2$            | 1.991  | 1.948  |
|                               | $K_2$            | 0.0393 | 0.0099 |

|                              |                 |        |        |
|------------------------------|-----------------|--------|--------|
| Weber Morris diffusion model | R <sup>2</sup>  | 0.9977 | 0.9753 |
|                              | K <sub>i</sub>  | 0.0627 | 0.1056 |
|                              | Z               | 1.022  | 0.1169 |
|                              | R <sup>2</sup>  | 0.9578 | 0.9275 |
| Elovich's equation           | B               | 4.0064 | 2.385  |
|                              | a               | 2.291  | 0.0854 |
|                              | R <sup>2</sup>  | 0.9786 | 0.9409 |
| Dumwald-Wagner               | K <sub>fd</sub> | 0.024  | 0.028  |
|                              | R <sup>2</sup>  | 0.7825 | 0.9433 |
| Bangham kinetic model        | K <sub>γ</sub>  | 26.479 | 4.038  |
|                              | γ               | 0.212  | 0.533  |
|                              | R <sup>2</sup>  | 0.9818 | 0.9496 |

**Table S2.** Freundlich, Dubinin-Radushkevich and Temkin parameters for copper

| <i>T</i><br>(K) | <i>Freundlich parameters</i> |                      |                       | <i>Dubinin-Radushkevich parameters</i> |                       |                   |                       | <i>Temkin parameters</i> |                            |                          |                       |
|-----------------|------------------------------|----------------------|-----------------------|----------------------------------------|-----------------------|-------------------|-----------------------|--------------------------|----------------------------|--------------------------|-----------------------|
|                 | <i>n</i>                     | <i>K<sub>f</sub></i> | <i>R</i> <sup>2</sup> | <i>Q<sub>S</sub></i>                   | <i>K<sub>DR</sub></i> | <i>E (kJ/mol)</i> | <i>R</i> <sup>2</sup> | <i>B (kJ/mol)</i>        | <i>A<sub>T</sub> (L/g)</i> | <i>b*10<sup>-3</sup></i> | <i>R</i> <sup>2</sup> |
| 298             | 1.66                         | 1.737                | 0.9758                | 3.555                                  | 2.00E-07              | 1.581             | 0.9812                | 2.318                    | 2.476                      | 1.068                    | 0.9859                |
| 304             | 1.58                         | 1.407                | 0.9871                | 3.166                                  | 2.00E-07              | 1.581             | 0.963                 | 2.129                    | 2.25                       | 1.186                    | 0.971                 |
| 309             | 1.48                         | 0.988                | 0.9854                | 2.511                                  | 3.00E-07              | 1.29              | 0.987                 | 1.739                    | 2.031                      | 1.477                    | 0.9768                |
| 315             | 1.35                         | 0.6908               | 0.9961                | 1.983                                  | 4.00E-07              | 1.118             | 0.9571                | 1.487                    | 1.809                      | 1.76                     | 0.9591                |

**Table S3.** Freundlich, Dubinin-Radushkevich and Temkin parameters for Zinc

| <i>T</i><br>(K) | <i>Freundlich parameters</i> |                      |                       | <i>Dubinin-Radushkevich parameters</i> |                       |                   |                       | <i>Temkin parameters</i> |                            |                          |                       |
|-----------------|------------------------------|----------------------|-----------------------|----------------------------------------|-----------------------|-------------------|-----------------------|--------------------------|----------------------------|--------------------------|-----------------------|
|                 | <i>n</i>                     | <i>K<sub>f</sub></i> | <i>R</i> <sup>2</sup> | <i>Q<sub>S</sub></i>                   | <i>K<sub>DR</sub></i> | <i>E (kJ/mol)</i> | <i>R</i> <sup>2</sup> | <i>B (kJ/mol)</i>        | <i>A<sub>T</sub> (L/g)</i> | <i>b*10<sup>-3</sup></i> | <i>R</i> <sup>2</sup> |
| 298             | 1.86                         | 0.989                | 0.9642                | 2.094                                  | 2.00E-07              | 1.58              | 0.9874                | 1.267                    | 2.502                      | 1.955                    | 0.9687                |
| 304             | 1.73                         | 0.807                | 0.9686                | 1.775                                  | 3.00E-07              | 1.29              | 0.9935                | 1.161                    | 2.287                      | 2.175                    | 0.9912                |
| 309             | 1.63                         | 0.647                | 0.9745                | 1.566                                  | 3.00E-07              | 1.29              | 0.9773                | 1.046                    | 2.11                       | 2.455                    | 0.9772                |
| 315             | 1.63                         | 0.373                | 0.9675                | 0.935                                  | 3.00E-07              | 1.29              | 0.959                 | 0.634                    | 2.024                      | 4.125                    | 0.9661                |
